# Supplementary material
Source: Springer Nature journal article supplement (https://www.springermedizin.de/resource/supplementary/12885_2010_2216_MOESM2_ESM.pdf/9460782)

**30 days**

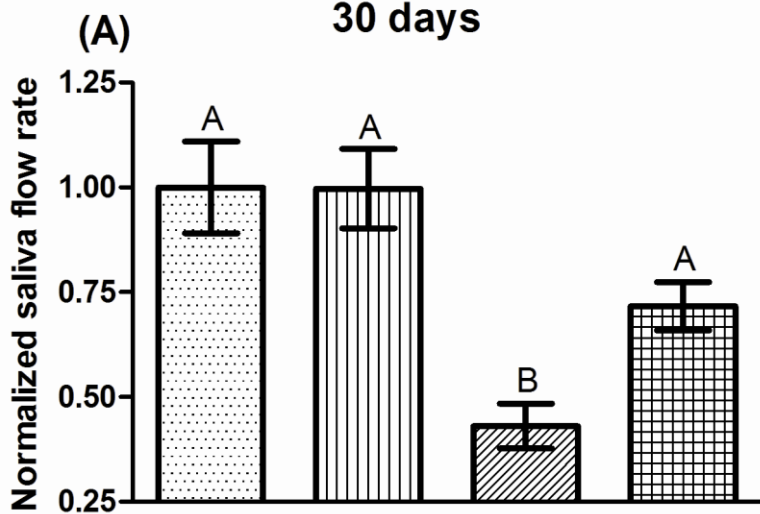

**60 days**

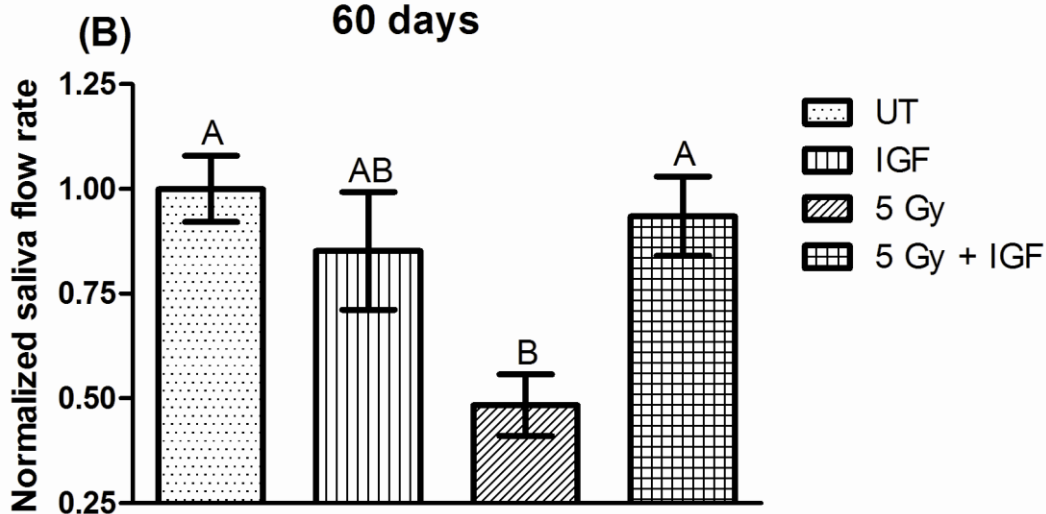

**90 days**

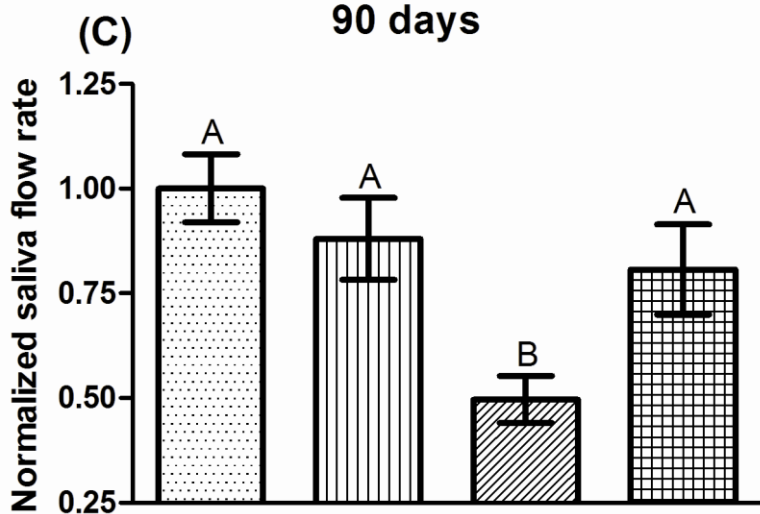

Supplement: MOESM2 [file 9460782]
